# Supplementary material
Source: publisher site journal article supplement (https://www.dovepress.com/article/189784)
Supplement: Supplementary file 1 [file get_supplementary_file.php]

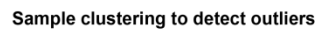

Figure S1 Samples clustering of GSE18520 and GSE27651 to detect outliers.

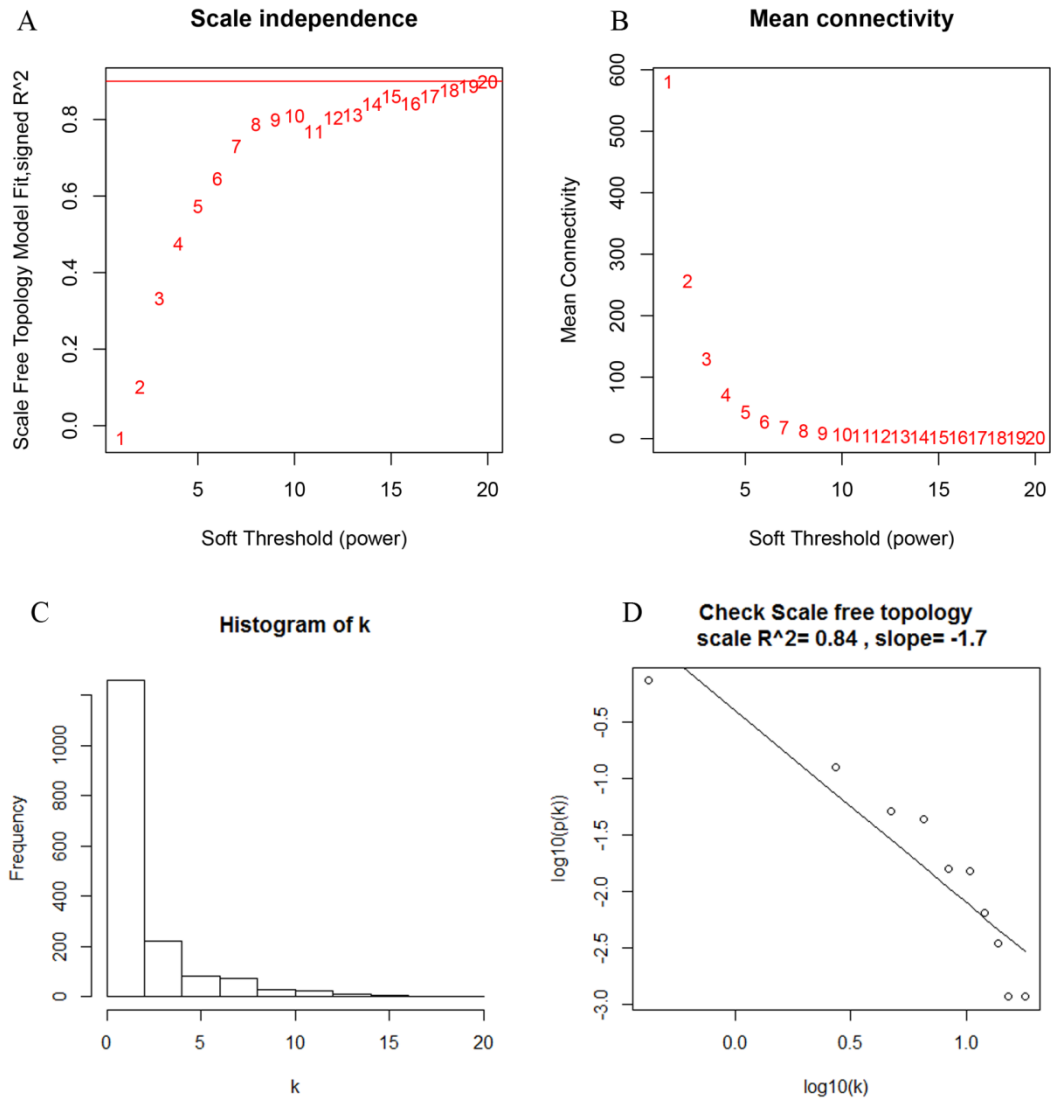

Figure S2 Determination of soft-thresholding power in WGCNA.

**Note:** (A) Analysis of the scale-free fit index for various soft-thresholding powers ( $\beta$ ). (B) Analysis of the mean connectivity for various soft-thresholding powers. (C) Histogram of connectivity distribution when  $\beta=15$ . (D) Checking the scale free topology when  $\beta=15$ .

**Abbreviations:** WGCNA, weighted gene co-expression network analysis.

| dynamicColors |      |       |       |      |         |      |     |           |        |
|---------------|------|-------|-------|------|---------|------|-----|-----------|--------|
| black         | blue | brown | green | grey | magenta | pink | red | turquoise | yellow |
| 78            | 297  | 168   | 86    | 472  | 29      | 44   | 83  | 325       | 118    |

  

| moduleColors |      |       |      |         |           |        |
|--------------|------|-------|------|---------|-----------|--------|
| black        | blue | brown | grey | magenta | turquoise | yellow |
| 161          | 341  | 254   | 472  | 29      | 325       | 118    |

Figure S3 Genes number of Clusters

**Note:** (A) All the clusters. (B) Clusters after merged.

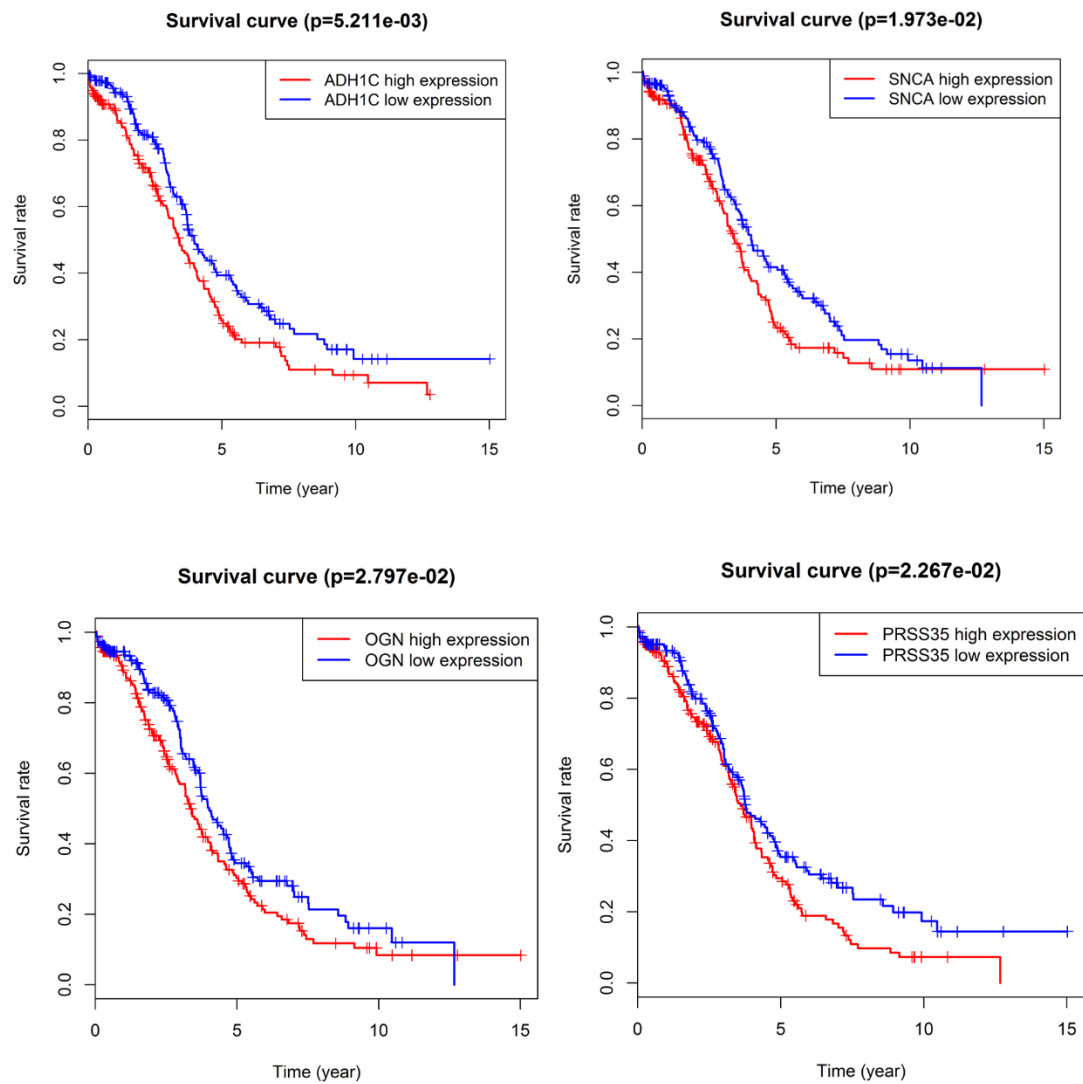

Figure S4 Survival analysis of the other four top genes.

**Note:** (A) ADH1C, (B) SNCA, (C) OGN, (D) PRSS35
